# Supplementary material
Source: PubMed Central journal article supplement (PMC2990391)
Supplement: supp_fdq001_fdq001supp.pdf [file supp_fdq001_fdq001supp.pdf]

**Supplementary Table 1.** Occurrence of breast cancer in women after benign breast disease by age group in the Oxford record linkage study area: time between admission for BBD and admission for breast cancer, number of women with breast cancer in the reference cohort, observed (Obs) number of women with cancer in the BBD cohort, expected (Exp) number of women with cancer in the BBD, ratio of rate of BBD cohort to that in the reference cohort, with 95% confidence intervals for the rate ratio

| Age (y)     | Time intervals <sup>1</sup> | Obs | Exp   | Adjusted rate ratio <sup>2</sup><br>(95% confidence interval) |
|-------------|-----------------------------|-----|-------|---------------------------------------------------------------|
| 18-49       | All (1934)                  | 575 | 321.2 | 2.2 (2.0-2.4)                                                 |
|             | 1st month                   | 68  | 9.4   | 54.2 (7.8-118.0)                                              |
|             | 1-11 months                 | 34  | 12.5  | 4.0 (2.7-6.0)                                                 |
|             | 1-4 years                   | 103 | 56.1  | 2.3 (1.8-2.8)                                                 |
|             | 5-9 years                   | 118 | 73.1  | 2.0 (1.6-2.4)                                                 |
|             | 10-19 years                 | 187 | 123.6 | 1.8 (1.5-2.0)                                                 |
|             | 20+ years                   | 67  | 46.6  | 1.5 (1.2-2.0)                                                 |
| 50-59       | All (926)                   | 158 | 61.8  | 2.6 (2.1-3.1)                                                 |
|             | 1st month                   | 16  | 1.4   | 16.0 (7.1-35.6)                                               |
|             | 1-11 months                 | 20  | 4.6   | 5.0 (2.9-8.4)                                                 |
|             | 1-4 years                   | 44  | 14.6  | 2.8 (2.0-4.0)                                                 |
|             | 5-9 years                   | 31  | 16.0  | 1.97 (1.3-2.9)                                                |
|             | 10-19 years                 | 39  | 19.8  | 2.0 (1.4-2.8)                                                 |
|             | 20+ years                   | 9   | 5.4   | 1.7 (0.8-3.5)                                                 |
| 60-69       | All (627)                   | 85  | 18.3  | 3.9 (3.0-5.0)                                                 |
|             | 1st month                   | 17  | 0.8   | 28.1 (12.8-60.0)                                              |
|             | 1-11 months                 | 11  | 1.4   | 8.4 (3.8-16.7)                                                |
|             | 1-4 years                   | 20  | 5     | 3.2 (1.7-5.5)                                                 |
|             | 5-9 years                   | 24  | 6.1   | 3.3 (2.0-5.3)                                                 |
|             | 10-19 years                 | 13  | 4.4   | 2.1 (0.9-4.0)                                                 |
| 70 and over | All (955)                   | 32  | 8.8   | 4.2 (2.9-5.9)                                                 |
|             | 1st month                   | 12  | 0.4   | 33.6 (16.0-64.3)                                              |
|             | 1-11 months                 | 6   | 1.0   | 5.0 (1.6-12.0)                                                |
|             | 1-4 years                   | 6   | 3.0   | 2.7 (1.2-5.4)                                                 |
|             | 5-9 years                   | 7   | 2.9   | 3.2 (1.4-6.1)                                                 |
|             | 10-19 years                 | 2   | 1.5   | 2.0 (0.4-6.0)                                                 |

The number of women admitted with BBD aged 18-49 was 60,468; aged 50-59 was 15,603; aged 60-69 was 6,517 and aged 70 and over was 3,876.

<sup>1</sup> Number of women with breast cancer in the reference cohort (in parentheses)

<sup>2</sup> Adjusted for age in 5-year age bands, time period in single calendar years and district of residence

**Supplementary Table 2.** Occurrence of breast cancer in women after benign breast disease by age group in the English dataset: all time intervals between admission for BBD and admission for breast cancer, total number of women with breast cancer in the reference cohort, observed (Obs) number with breast cancer in the BBD cohort, expected (Exp) number with breast cancer in the BBD cohort, ratio of rate of BBD cohort to that in the reference cohort, with 95% confidence intervals for the rate ratio; and percentage of women with BBD who subsequently had breast cancer

| <b>Age (years)</b> | <b>Time interval<sup>1</sup></b> | <b>Obs</b> | <b>Exp</b> | <b>Rate ratio<sup>2</sup> (95% CI)</b> | <b>% total with breast cancer</b> |
|--------------------|----------------------------------|------------|------------|----------------------------------------|-----------------------------------|
| 18-49              | All (60468)                      | 691        | 247.9      | 3.4 (3.1-3.7)                          | 1.14                              |
| 50-59              | All (17176)                      | 564        | 204.3      | 3.1 (2.8-3.4)                          | 3.28                              |
| 60-69              | All (7306)                       | 279        | 87.2       | 3.4 (3.0-3.8)                          | 3.82                              |
| 70 and over        | All (4318)                       | 213        | 50.6       | 4.3 (3.7-4.9)                          | 4.93                              |

<sup>1</sup> Number of women with breast cancer in the reference cohort (in parentheses)

<sup>2</sup> Adjusted for age in 5-year age bands, time period in single calendar years and district of residence
